# Supplementary material
Source: Springer Nature journal article supplement (https://www.springermedizin.de/resource/supplementary/12885_2013_4401_MOESM1_ESM.pdf/9466318)

**Inset**

**LNCaP**      **PC3**

110kDa →

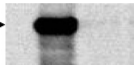

**LNCaP Cells Untreated**

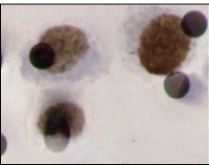

**LNCaP Cells Treated**

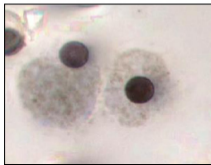

**PC3 Cells**

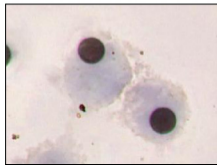

Supplement: MOESM1 [file 9466318]
